# Supplementary material for: A Follow-Up Study on the Thai Pharmacogenomics Database-1 (TPGxD-1): Validating CYP2D6 Allele Calls Using Contemporary Bioinformatics Tools
Source: Research Square preprint supplement (doi:10.21203/rs.3.rs-4489678/v1), 2024-06-18
Supplement: Supplementary file 1 [file 7b3626c9d378cf84bc0d2922.docx]

**Supplementary Table 4: Overall reported Diplotype/SVs/CNVs in four different Algorithms in 942 WGS data for *CYP2D6***

| *Alleles* | SG | sPGx | Cyrius | Aldy |
| --- | --- | --- | --- | --- |
| **1/*1* | 57 | 51 | 50 | 51 |
| **1/*1+rs1065852* | NA | NA | NA | 2 |
| **1/*1+rs781457579* | NA | NA | NA | 1 |
| **1/*10* | 79 | 68 | 64 | 87 |
| **1/*10+*10* | NA | NA | NA | 12 |
| **1/*10x2* | 18 | 4 | 1 | NA |
| **1/*122* | 1 | NA | NA | NA |
| **1/*122+rs61737946* | NA | NA | NA | 1 |
| **1/*139* | 1 | NA | NA | 1 |
| **1/*14* | 6 | 5 | 6 | 5 |
| **1/*144* | 2 | NA | NA | 2 |
| **1/*19* | 1 | 1 | 1 | NA |
| **1/*19+rs61737946+rs61745683* | NA | NA | NA | 1 |
| **1/*1x2* | 1 | 1 | 1 | 1 |
| **1/*2* | 36 | 34 | 37 | 34 |
| **1/*2x2* | 1 | 1 | 1 | NA |
| **1/*36* | NA | 2 | 1 | 1 |
| **1/*36+*10* | 110 | 111 | 123 | 88 |
| **1/*36+*10x2* | NA | 2 | NA | NA |
| **1/*36+*36+*10* | NA | NA | 6 | NA |
| **1/*36x2* | NA | 5 | NA | NA |
| **1/*36x2+*10* | NA | 6 | NA | NA |
| **1/*36x4+*10x2* | NA | 1 | NA | NA |
| **1/*39* | 4 | 3 | 4 | 4 |
| **1/*4* | 2 | 2 | 2 | 1 |
| **1/*41* | 26 | 22 | 22 | 5 |
| **1/*49* | NR | 1 | 1 | 1 |
| **1/*4C* | NA | NA | NA | 1 |
| **1/*5* | 29 | NA | 29 | 29 |
| **1/*68+*4* | 1 | NA | 1 | NA |
| **1/*7* | NA | NA | NA | 1 |
| **1/*71* | 1 | 1 | NA | NA |
| **1+*1/*10* | NA | NA | NA | 3 |
| **1+*1/*36.* | NA | NA | NA | 1 |
| **1+*1/*36.+*10* | NA | NA | NA | 1 |
| **1+*1/*36.+*10+*36.* | NA | NA | NA | 1 |
| **1+*1+rs1065852/*36.* | NA | NA | NA | 2 |
| **1+*1+rs140513104/*10* | NA | NA | NA | 1 |
| **1+*10/*36.+*10* | NA | NA | NA | 2 |
| **1+*2/*36+*10* | NA | NA | 1 |  |
| **1+*36./*142* | NA | NA | NA | 1 |
| **1+*36./*36.+*10* | NA | NA | NA | 6 |
| **1+*36.+*10/*10+*10+*10+*36.+*10* | NA | NA | NA | 1 |
| **1+*61/*10* | NA | NA | NA | 1 |
| **1+*71/*61,*1+*83./*71* | NA | NA | NA | 1 |
| **1+*83./*10* | NA | NA | NA | 1 |
| **1+rs1065852/*10* | NA | NA | NA | 1 |
| **1+rs1065852/*71* | NA | NA | NA | 1 |
| **1+rs1065852/*75* | NA | NA | NA | 1 |
| **1+rs1065852+*86+rs1456026511/*36.* | NA | NA | NA | 1 |
| **1+rs1135835/*10* | NA | NA | NA | 1 |
| **1+rs140513104/*2* | NA | NA | NA | 1 |
| **1+rs140513104/*36.+*10* | NA | NA | NA | 4 |
| **1+rs140513104+*83./*10* | NA | NA | NA | 1 |
| **10_*10_*83* | NA | NA | 2 | NA |
| **10_*36_*4_*68* | NA | NA | 1 | NA |
| **10_*4.013_*56;*36_*4_*56* | NA | NA | 1 | NA |
| **10/*10* | 38 | 28 | 22 | 39 |
| **10/*10x2* | 11 | 20 | 1 | 21 |
| **10/*10x3* | NA | 7 | NA | NA |
| **10/*10x5* | NA | 3 | NA | NA |
| **10/*119+rs1135840* | NA | NA | NA | 1 |
| **10/*13C* | 1 | NA | NA | NA |
| **10/*14* | 1 | 2 | 1 | 1 |
| **10/*14x2* | 1 | NA | 1 | NA |
| **10/*152* | 1 | NA | NA | 1 |
| **10/*1x2* | NA | 1 | NA | NA |
| **10/*2* | NA | 16 | 17 | NA |
| **10/*21* | 1 | 1 | NA | 1 |
| **10/*23* | NA | NA | NA | 1 |
| **10/*2x2* | NA | 1 | NA | NA |
| **10/*2x3* | NA | 1 | NA | NA |
| **10/*34* | 1 | NA | NA | NA |
| **10/*35* | 1 | 1 | 1 | 1 |
| **10/*36* | 1 | 26 | NA | 31 |
| **10/*36.+*10+rs1135835* | NA | NA | NA | 1 |
| **10/*36+*10* | 96 | 90 | 99 | 100 |
| **10/*36+*10x3* | NA | 1 | NA | NA |
| **10/*36x2* | NA | 6 | NA | NA |
| **10/*36x3+*10* | 13 | NA | NA | NA |
| **10/*39* | 2 | 3 | 1 | 1 |
| **10/*4* | NA | 4 | 3 | NA |
| **10/*41* | 19 | NA | 18 | 18 |
| **10/*41 or *39/*69* | NA | 2 | NA | NA |
| **10/*49* | NA | 1 | 1 | 1 |
| **10/*5* | NA | NA | 18 | NA |
| **10/*61* | NA | NA | NA | 1 |
| **10/*65* | NA | NA | NA | 2 |
| **10/*69* | NA | NA | NA | 1 |
| **10/*71* | 5 | 5 | 5 | 7 |
| **10/*75* | 1 | NA | NA | NA |
| **10/*83* | NA | 1 | NA | 1 |
| **10+*10/*122+rs61737946* | NA | NA | NA | 1 |
| **10+*10/*34+*83.* | NA | NA | NA | 1 |
| **10+*10/*36.+*10* | NA | NA | NA | 15 |
| **10+*10/*36.+*10+rs3021084* | NA | NA | NA | 1 |
| **10+*10/*36.+*10+rs72549346* | NA | NA | NA | 1 |
| **10+*10/*83.* | NA | NA | NA | 1 |
| **10+*10+*10/*36.+*10* | NA | NA | NA | 1 |
| **10+*10+*10+*36.+*10/*36.+*10* | NA | NA | NA | 1 |
| **10+*10+*36.+*10/*36.+*10* | NA | NA | NA | 4 |
| **10+*36.+*10/*36.+*10* | NA | NA | NA | 10 |
| **10+*36.+*10+rs1135835+rs1135833/*36.+*10* | NA | NA | NA | 1 |
| **10+*39/*14* | NA | NA | NA | 1 |
| **10+*83./*69* | NA | NA | NA | 6 |
| **10+*83./*79* | NA | NA | NA | 1 |
| **10+rs1135824+*69/*68:2* | NA | NA | NA | 1 |
| **10+rs1135828/*49* | NA | NA | NA | 1 |
| **10+rs1135835+rs1135833/*36.* | NA | NA | NA | 2 |
| **10+rs1456026511/*36.* | NA | NA | NA | 1 |
| **10x2/*1x2* | NA | 1 | NA | NA |
| **10x2/*2* | NA | NA | 1 | NA |
| **10x2/*36+*10* | 11 | 9 | 3 | NA |
| **10x2/*41* | 2 | NA | NA | NA |
| **10x2/*71* | 1 | NA | NA | NA |
| **110/*2* | NA | 1 | NA | NA |
| **119_*2;*1_*41* | NA | NA | 1 | NA |
| **119/*136* | NA | 1 | NA | NA |
| **119/*34* | NA | 1 | NA | NA |
| **119/*39* | NA | 1 | NA | NA |
| **122/*122* | 1 | NA | 1 | NA |
| **13/*36.* | NA | NA | NA | 1 |
| **13C/*39* | 1 | NA | NA | NA |
| **14/*2* | NA | 1 | 1 | NA |
| **14/*36+*10* | 7 | 6 | 6 | 6 |
| **14/*41* | 1 | 1 | 1 | 1 |
| **14/*55* | NA | NA | NA | 1 |
| **140/*36+*10* | NA | 1 | NA | NA |
| **142/*36+*10* | NA | 1 | NA | NA |
| **144/*1* | NA | 2 | NA | NA |
| **144/*10x2* | NA | 1 | NA | NA |
| **144/*36+*10* | NA | 3 | NA | NA |
| **144/*41* | NA | 2 | NA | NA |
| **1x2/*10* | 2 | NA | 2 | NA |
| **1x2/*36+*10* | 4 | NA | 1 | NA |
| **2/*10* | 19 | NA | NA | 21 |
| **2/*10+*10* | NA | NA | NA | 3 |
| **2/*10+*83.* | NA | NA | NA | 1 |
| **2/*10x2* | 4 | 2 | NA | NA |
| **2/*10x3* | NA | 1 | NA | NA |
| **2/*110* | 1 | NA | NA | 1 |
| **2/*114* | NA | NA | NA | 1 |
| **2/*119* | NA | NA | NA | 21 |
| **2/*122+rs1135840+rs16947* | NA | NA | NA | 2 |
| **2/*13* | NA | NA | 1 | NA |
| **2/*13C* | 1 | NA | NA | NA |
| **2/*14* | 1 | NA | NA | 1 |
| **2/*16,*2/*77* | NA | NA | NA | 1 |
| **2/*2* | 11 | 8 | 11 | 8 |
| **2/*2+rs61737946+rs61745683* | NA | NA | NA | 1 |
| **2/*34* | NA | NA | NA | 1 |
| **2/*35* | 1 | 1 | 1 | 1 |
| **2/*36.* | NA | NA | NA | 1 |
| **2/*36.+*10* | NA | NA | NA | 33 |
| **2/*36+*10* | 36 | 36 | 42 | NA |
| **2/*36+*36+*10* | NA | 1 | 3 | NA |
| **2/*36x2* | NA | 1 | NA | NA |
| **2/*39* | 2 | 2 | 2 | NA |
| **2/*39* | NA | NA | NA | 2 |
| **2/*4* | 2 | 1 | 2 | NA |
| **2/*4.021* | NA | NA | NA | 1 |
| **2/*41* | 6 | 5 | 6 | 6 |
| **2/*4C* | NA | NA | NA | 1 |
| **2/*5* | 8 | NA | 8 | 7 |
| **2/*65* | NA | NA | NA | 2 |
| **2/*75* | NA | NA | 1 | NA |
| **2+*2/*10+*65* | NA | NA | NA | 1 |
| **2+*2+*2/*36.+*10* | NA | NA | NA | 2 |
| **2+*36./*36.+*10* | NA | NA | NA | 2 |
| **2+*61/*10+*10* | NA | NA | NA | 1 |
| **2+rs1058172/*5* | NA | NA | NA | 1 |
| **2+rs140513104/*119* | NA | NA | NA | 1 |
| **21/*41* | 1 | 1 | 1 | 1 |
| **22/*36+*10* | 1 | 1 | 1 | NA |
| **23/*36+*10* | NA | NA | 1 | NA |
| **23/*41* | 1 | 1 | 1 | 1 |
| **2x3/*36+*10* | 2 | NA | NA | NA |
| **33/*36+*10* | 2 | 1 | 2 | 2 |
| **34x2/*36+*10* | 1 | NA | NA | NA |
| **36./*36.+*10* | NA | NA | NA | 8 |
| **36./*36.+*10+rs1135835+rs1135833* | NA | NA | NA | 1 |
| **36./*39* | NA | NA | NA | 5 |
| **36./*41* | NA | NA | NA | 1 |
| **36./*65* | NA | NA | NA | 2 |
| **36.+*10/*140* | NA | NA | NA | 1 |
| **36.+*10/*142* | NA | NA | NA | 1 |
| **36.+*10/*144* | NA | NA | NA | 5 |
| **36.+*10/*153* | NA | NA | NA | 2 |
| **36.+*10/*36.+*10* | NA | NA | NA | 52 |
| **36.+*10/*36.+*10+*49* | NA | NA | NA | 1 |
| **36.+*10/*36.+*10+rs1135835+rs1135833* | NA | NA | NA | 2 |
| **36.+*10/*36.+*153+rs1135840+rs1065852* | NA | NA | NA | 1 |
| **36.+*10/*36.+*48+rs1135840+rs1065852* | NA | NA | NA | 1 |
| **36.+*10/*36.+*71* | NA | NA | NA | 2 |
| **36.+*10/*39* | NA | NA | NA | 1 |
| **36.+*10/*41* | NA | NA | NA | 7 |
| **36.+*10/*65* | NA | NA | NA | 1 |
| **36.+*10/*68+*4* | NA | NA | NA | 1 |
| **36.+*10/*69* | NA | NA | NA | 1 |
| **36.+*10/*69+*83.* | NA | NA | NA | 1 |
| **36.+*36./*65* | NA | NA | NA | 1 |
| **36.+*39/*69* | NA | NA | NA | 1 |
| **36/*36+*10* | NA | NA | 1 | NA |
| **36+*10/*34x2* | NA | 1 | NA | NA |
| **36+*10/*36+*10* | 90 | 70 | 77 | NA |
| **36+*10/*36+*10x2* | NA | 2 | NA | NA |
| **36+*10/*36+*36* | NA | NA | 1 | NA |
| **36+*10/*36+*36+*10* | NA | NA | 8 | NA |
| **36+*10/*36x2+*10* | NA | 7 | NA | NA |
| **36+*10/*39* | 2 | NA | NA | NA |
| **36+*10/*41* | 16 | NA | NA | NA |
| **36+*10/*41x2* | 1 | NA | NA | NA |
| **36+*10/*71* | 3 | NA | NA | NA |
| **36+*10/*86* | 1 | NA | NA | NA |
| **36+*36/*2* | NA | NA | 1 | NA |
| **36+*36/*41* | NA | NA | 1 | NA |
| **36+*36+*10/*36+*36+*10* | NA | NA | 4 | NA |
| **39/*13* | NA | NA | 1 | NA |
| **39/*14x2* | NA | 1 | NA | NA |
| **39/*1x2* | NA | 1 | NA | NA |
| **39/*36+*10* | NA | 4 | NA | NA |
| **39/*39* | NA | NA | NA | 1 |
| **39/*4* | NA | NA | 1 | NA |
| **39/*4* | NA | 1 | NA |  |
| **39/*41* | 2 | 1 | NA | 1 |
| **39/*41+rs367543000* | NA | NA | NA | 1 |
| **39/*68:2+*4.021* | NA | NA | NA | 1 |
| **39/*69* | NA | 14 | NA | 4 |
| **39/*69x2* | NA | 14 | NA | NA |
| **39/*71* | 1 | 1 | 1 | 1 |
| **39/*77,*16/*39* | NA | NA | NA | 1 |
| **4/*10* | 5 | NA | NA | 2 |
| **4/*10x2* | 2 | 2 | NA | 1 |
| **4/*36.+*56B* | NA | NA | NA | 1 |
| **4/*36+*10* | NA | NA | 9 | NA |
| **4/*36+*10* | 3 | 5 | NA | 3 |
| **4/*41* | 1 | 1 | 1 | NA |
| **4/*5* | 1 | NA | 2 | NA |
| **41/*122* | 3 | NA | NA | NA |
| **41/*122+rs61737946* | NA | NA | NA | 1 |
| **41/*144* | 1 | NA | NA | 2 |
| **41/*36+*10* | NA | NA | 15 | NA |
| **41/*36+*36+*10* | NA | NA | 1 | NA |
| **41/*41* | 3 | 3 | 3 | 3 |
| **41/*43* | 1 | 1 | 1 | 1 |
| **41/*5* | NA | NA | 2 | NA |
| **41/*62* | 1 | NA | NA | NA |
| **41/*81* | 1 | NA | NA | NA |
| **41/*94* | NA | 1 | NA | 1 |
| **41/*94* | NA | NA | 1 | NA |
| **4C/*10* | NA | NA | NA | 2 |
| **4C/*36.+*10* | NA | NA | NA | 5 |
| **4C/*36.+*10+rs28371704* | NA | NA | NA | 1 |
| **4C/*39* | NA | NA | NA | 1 |
| **4C/*41* | NA | NA | NA | 1 |
| **4C/*5* | NA | NA | NA | 2 |
| **4N+*4/*10* | 5 | NA | NA | NA |
| **4N+*4/*10x2* | 1 | NA | NA | NA |
| **4N+*4/*68+*4* | 1 | NA | NA | NA |
| **5/*1* | NA | 30 | NA | NA |
| **5/*10* | 17 | 18 | NA | 16 |
| **5/*139* | 2 | 2 | NA | 1 |
| **5/*2* | Na | 6 | NA | NA |
| **5/*36+*10* | 28 | NA | 29 | NA |
| **5/*39* | 1 | 3 | NA | NA |
| **5/*4* | NA | 2 | NA | NA |
| **5/*41* | 2 | 2 | NA | 2 |
| **5/*41+rs730882251* | NA | NA | NA | 1 |
| **5/*5* | NA | 1 | 1 | NA |
| **5/*62* | 1 | NA | NA | NA |
| **5/*71* | 1 | NA | NA | NA |
| **5/*71+rs1058172* | NA | NA | NA | 1 |
| **5/*83+*2* | 1 | NA | NA | NA |
| **62+rs1135840/*69* | NA | NA | NA | 1 |
| **65/*36* | NA | 1 | NA | NA |
| **65/*36x2+*10* | NA | 1 | NA | NA |
| **69/*36+*10* | NA | 1 | NA | NA |
| **69/*39x2* | NA | 2 | NA | NA |
| **69/*83* | NA | 3 | NA | NA |
| **7/*36.+*10* | NA | NA | NA | 1 |
| **71/*36+*10* | NA | 3 | 4 | NA |
| **71/*36+*36+*10* | NA | 1 | 1 | NA |
| **71/*5* | NA | NA | 1 | NA |
| **74/*68+*4* | NA | 1 | NA | NA |
| **S2+*1/*10* | 1 | NA | NA | NA |
| *not called* | 47 | 33 | 132 | 6 |
| *PNA* | NA | 69 | NA | NA |

*PNA =possible novel alleles, NA -not available, SG=Stargazer, sPGx=stellar PGx*

**Supplementary Table 2: Discordant Diplotype/SVs/CNVs and Phenotype between SGv2.0.2 and sPGx**

| *SG* | Phenotype | *Spgx* | phenotype |
| --- | --- | --- | --- |
| **10/*36+*10* | IMs | **142/*36+*10* | UKMs |
| **4N+*4/*68+*4* | PMs | **4/*10x2* | IMs |
| **36+*10/*36+*10* | IMs | **10x2/*1x2* | UMs |
| **36+*10/*36+*10* | IMs | **1/*36+*10x2* | NMs |
| **1/*36+*10* | NMs | **140/*36+*10* | UKMs |
| **1/*36+*10* | NMs | **144/*10x2* | UKMs |
| **36+*10/*36+*10* | IMs | **2/*36x2+*10* | NMs |
| **1/*36+*10* | NMs | **1/*36x2* | IMs |
| **10/*41* | IMs | **69/*83* | UKMs |
| **1/*139* | UKMs | **1/*1* | NMs |
| **1/*41* | NMs | **119/*136* | UKMs |
| **41/*122* | UKMs | **1/*41* | NMs |
| **36+*10/*41* | IMs | **69/*39x2* | NMs |
| **10/*41* | IMs | **10/*41 or *39/*69* | UKMs |
| **36+*10/*36+*10* | IMs | **1/*36x2+*10* | NMs |
| **1x2/*10* | NMs | **39/*1x2* | UMs |
| **2/*36+*10* | NMs | **2/*36x2* | IMs |
| **36+*10/*36+*10* | IMs | **1/*36x2+*10* | NMs |
| **36+*10/*36+*10* | IMs | **71/*36x2+*10* | UKMs |
| **36+*10/*36+*10* | IMs | **1/*36x2+*10* | NMs |
| **1/*68+*4* | IMs | **74/*68+*4* | UKMs |
| **1x2/*36+*10* | NMs | **144/*36+*10* | UKMs |
| **5/*36+*10* | IMs | **69/*83* | UKMs |
| **41/*43* | UKMs | **41/*43* | IMs |
| **36+*10/*36+*10* | IMs | **65/*36x2+*10* | UKMs |
| **36+*10/*41* | IMs | **69/*39x2* | NMs |
| **36+*10/*36+*10* | IMs | **1/*36x2+*10* | NMs |
| **5/*36+*10* | IMs | **1/*10* | NMs |
| **36+*10/*36+*10* | IMs | **1/*36x2+*10* | NMs |
| **5/*36+*10* | IMs | **1/*10* | NMs |
| **1/*36+*10* | NMs | **144/*36+*10* | UKMs |
| **10/*41* | IMs | **69/*83* | UKMs |
| **1/*36+*10* | NMs | **1/*36x2* | IMs |
| **1/*36+*10* | NMs | **144/*36+*10* | UKMs |
| **1/*10* | NMs | **1/*36* | IMs |
| **36+*10/*41x2* | NMs | **39/*69x2* | IMs |
| **10/*41* | IMs | **41/*94* | UKMs |
| **1x2/*36+*10* | NMs | **1/*36x2* | IMs |
| **1/*1* | NMs | **1/*36* | IMs |
| **36+*10/*36+*10* | IMs | **1/*36x2+*10* | NMs |
| **5/*10* | IMs | **5/*4* | PMs |
| **1/*41* | NMs | **144/*41* | UKMs |
| **36+*10/*41* | IMs | **2/*36+*10* | NMs |
| **1/*36+*10* | NMs | **1/*36x2* | IMs |
| **36+*10/*41* | IMs | **39/*36+*10* | NMs |
| **1/*41* | NMs | **119/*34* | UKMs |
| **1/*36+*10* | NMs | **1/*36x2* | IMs |
| **10/*39* | NMs | **10/*10* | IMs |
| **5/*83+*2* | UKMs | **39/*69* | IMs |
| **1/*1* | NMs | **5/*1* | IMs |
| **1/*1* | NMs | **5/*1* | IMs |
| **1/*1* | NMs | **5/*39* | IMs |
| **2/*10x2* | NMs | **39/*69x2* | IMs |
| **1/*10* | NMs | **5/*10* | IMs |
| **2/*10* | NMs | **65/*36* | UKMs |

*SG=Stargazer, sPGx=stellar PGx, NMs =normal metabolizers, IMs-intermediate metabolizers, PMs =poor metabolizers, UM=ultra-metabolizer, UKM =unknown metabolizers.*

**Supplementary Table 3: Unique diplotype/SVs-CNVs identified in other algorithms.**

| **Algorithms** | **Alleles** | **N** |
| --- | --- | --- |
| **Cyrius** | **1/*36+*36+*10* | 6 |
|  | **10_*10_*83* | 2 |
|  | **10_*36_*4_*68* | 1 |
|  | **10_*4.013_*56;*36_*4_*56* | 1 |
|  | **10/*5* | 18 |
|  | **10x2/*2* | 1 |
|  | **119_*2;*1_*41* | 1 |
|  | **2/*13* | 1 |
|  | **2/*75* | 1 |
|  | **23/*36+*10* | 1 |
|  | **36/*36+*10* | 1 |
|  | **36+*10/*36+*36* | 1 |
|  | **36+*10/*36+*36+*10* | 8 |
|  | **36+*36/*2* | 1 |
|  | **36+*36/*41* | 1 |
|  | **36+*36+*10/*36+*36+*10* | 4 |
|  | **39/*13* | 1 |
|  | **39/*4* | 1 |
|  | **4/*36+*10* | 9 |
|  | **41/*36+*10* | 15 |
|  | **41/*36+*36+*10* | 1 |
|  | **41/*5* | 2 |
|  | **41/*94* | 1 |
|  | **71/*5* | 1 |
|  |  | 80 |
| **spgx** | **Alleles** | **N** |
|  | **1/*36+*10x2* | 2 |
|  | **1/*36x2* | 5 |
|  | **1/*36x2+*10* | 6 |
|  | **1/*36x4+*10x2* | 1 |
|  | **10/*10x3* | 7 |
|  | **10/*10x5* | 3 |
|  | **10/*1x2* | 1 |
|  | **10/*2x2* | 1 |
|  | **10/*2x3* | 1 |
|  | **10/*36+*10x3* | 1 |
|  | **10/*36x2* | 6 |
|  | **10/*41 or *39/*69* | 2 |
|  | **10x2/*1x2* | 1 |
|  | **110/*2* | 1 |
|  | **119/*136* | 1 |
|  | **119/*34* | 1 |
|  | **119/*39* | 1 |
|  | **140/*36+*10* | 1 |
|  | **142/*36+*10* | 1 |
|  | **144/*1* | 2 |
|  | **144/*10x2* | 1 |
|  | **144/*36+*10* | 3 |
|  | **144/*41* | 2 |
|  | **2/*10x3* | 1 |
|  | **2/*36x2* | 1 |
|  | **36+*10/*34x2* | 1 |
|  | **36+*10/*36+*10x2* | 2 |
|  | **36+*10/*36x2+*10* | 7 |
|  | **39/*14x2* | 1 |
|  | **39/*1x2* | 1 |
|  | **39/*36+*10* | 4 |
|  | **39/*69x2* | 14 |
|  | **5/*1* | 30 |
|  | **5/*2* | 6 |
|  | **5/*4* | 2 |
|  | **65/*36* | 1 |
|  | **65/*36x2+*10* | 1 |
|  | **69/*36+*10* | 1 |
|  | **69/*39x2* | 2 |
|  | **69/*83* | 3 |
|  | **74/*68+*4* | 1 |
|  |  | 130 |
| **Aldy** | **Alleles** | **N** |
|  | **1/*1+rs1065852* | 2 |
|  | **1/*1+rs781457579* | 1 |
|  | **1/*10+*10* | 12 |
|  | **1/*122+rs61737946* | 1 |
|  | **1/*19+rs61737946+rs61745683* | 1 |
|  | **1/*4C* | 1 |
|  | **1/*7* | 1 |
|  | **1+*1/*10* | 3 |
|  | **1+*1/*36.* | 1 |
|  | **1+*1/*36.+*10* | 1 |
|  | **1+*1/*36.+*10+*36.* | 1 |
|  | **1+*1+rs1065852/*36.* | 2 |
|  | **1+*1+rs140513104/*10* | 1 |
|  | **1+*10/*36.+*10* | 2 |
|  | **1+*36./*142* | 1 |
|  | **1+*36./*36.+*10* | 6 |
|  | **1+*36.+*10/*10+*10+*10+*36.+*10* | 1 |
|  | **1+*61/*10* | 1 |
|  | **1+*71/*61,*1+*83./*71* | 1 |
|  | **1+*83./*10* | 1 |
|  | **1+rs1065852/*10* | 1 |
|  | **1+rs1065852/*71* | 1 |
|  | **1+rs1065852/*75* | 1 |
|  | **1+rs1065852+*86+rs1456026511/*36.* | 1 |
|  | **1+rs1135835/*10* | 1 |
|  | **1+rs140513104/*2* | 1 |
|  | **1+rs140513104/*36.+*10* | 4 |
|  | **1+rs140513104+*83./*10* | 1 |
|  | **10/*119+rs1135840* | 1 |
|  | **10/*23* | 1 |
|  | **10/*36.+*10+rs1135835* | 1 |
|  | **10/*61* | 1 |
|  | **10/*65* | 2 |
|  | **10/*69* | 1 |
|  | **10+*10/*122+rs61737946* | 1 |
|  | **10+*10/*34+*83.* | 1 |
|  | **10+*10/*36.+*10* | 15 |
|  | **10+*10/*36.+*10+rs3021084* | 1 |
|  | **10+*10/*36.+*10+rs72549346* | 1 |
|  | **10+*10/*83.* | 1 |
|  | **10+*10+*10/*36.+*10* | 1 |
|  | **10+*10+*10+*36.+*10/*36.+*10* | 1 |
|  | **10+*10+*36.+*10/*36.+*10* | 4 |
|  | **10+*36.+*10/*36.+*10* | 10 |
|  | **10+*36.+*10+rs1135835+rs1135833/*36.+*10* | 1 |
|  | **10+*39/*14* | 1 |
|  | **10+*83./*69* | 6 |
|  | **10+*83./*79* | 1 |
|  | **10+rs1135824+*69/*68:2* | 1 |
|  | **10+rs1135828/*49* | 1 |
|  | **10+rs1135835+rs1135833/*36.* | 2 |
|  | **10+rs1456026511/*36.* | 1 |
|  | **13/*36.* | 1 |
|  | **14/*55* | 1 |
|  | **2/*10+*10* | 3 |
|  | **2/*10+*83.* | 1 |
|  | **2/*114* | 1 |
|  | **2/*119* | 21 |
|  | **2/*122+rs1135840+rs16947* | 2 |
|  | **2/*16,*2/*77* | 1 |
|  | **2/*2+rs61737946+rs61745683* | 1 |
|  | **2/*34* | 1 |
|  | **2/*36.* | 1 |
|  | **2/*36.+*10* | 33 |
|  | **2/*39* | 2 |
|  | **2/*4.021* | 1 |
|  | **2/*4C* | 1 |
|  | **2/*65* | 2 |
|  | **2+*2/*10+*65* | 1 |
|  | **2+*2+*2/*36.+*10* | 2 |
|  | **2+*36./*36.+*10* | 2 |
|  | **2+*61/*10+*10* | 1 |
|  | **2+rs1058172/*5* | 1 |
|  | **2+rs140513104/*119* | 1 |
|  | **36./*36.+*10* | 8 |
|  | **36./*36.+*10+rs1135835+rs1135833* | 1 |
|  | **36./*39* | 5 |
|  | **36./*41* | 1 |
|  | **36./*65* | 2 |
|  | **36.+*10/*140* | 1 |
|  | **36.+*10/*142* | 1 |
|  | **36.+*10/*144* | 5 |
|  | **36.+*10/*153* | 2 |
|  | **36.+*10/*36.+*10* | 52 |
|  | **36.+*10/*36.+*10+*49* | 1 |
|  | **36.+*10/*36.+*10+rs1135835+rs1135833* | 2 |
|  | **36.+*10/*36.+*153+rs1135840+rs1065852* | 1 |
|  | **36.+*10/*36.+*48+rs1135840+rs1065852* | 1 |
|  | **36.+*10/*36.+*71* | 2 |
|  | **36.+*10/*39* | 1 |
|  | **36.+*10/*41* | 7 |
|  | **36.+*10/*65* | 1 |
|  | **36.+*10/*68+*4* | 1 |
|  | **36.+*10/*69* | 1 |
|  | **36.+*10/*69+*83.* | 1 |
|  | **36.+*36./*65* | 1 |
|  | **36.+*39/*69* | 1 |
|  | **39/*39* | 1 |
|  | **39/*41+rs367543000* | 1 |
|  | **39/*68:2+*4.021* | 1 |
|  | **39/*77,*16/*39* | 1 |
|  | **4/*36.+*56B* | 1 |
|  | **41/*122+rs61737946* | 1 |
|  | **4C/*10* | 2 |
|  | **4C/*36.+*10* | 5 |
|  | **4C/*36.+*10+rs28371704* | 1 |
|  | **4C/*39* | 1 |
|  | **4C/*41* | 1 |
|  | **4C/*5* | 2 |
|  | **5/*41+rs730882251* | 1 |
|  | **5/*71+rs1058172* | 1 |
|  | **62+rs1135840/*69* | 1 |
|  | **7/*36.+*10* | 1 |
|  |  | 311 |

**Supplementary Table 4: Unique diplotype/SVs-CNVs identified in SG and alternative diplotype/SVs reported in other algorithms**

| ***Alleles*** | ***SG*** | ***sPGx*** | ***Cyrius*** | ***Aldy*** |
| --- | --- | --- | --- | --- |
| **1/*122* | *1* | *PNA* | **1/*1* | **1/*122+rs61737946* |
| **10/*13C* | *1* | **10/*5* | **10/*5* | **10/*5* |
| **10/*34* | *1* | **10/*39* | *None* | **2/*65* |
| **10/*75* | *1* | *PNA* | *None* | **1+rs1065852/*75* |
| **10x2/*41* | *2* | **39/*69x2* | **41/*36+*10* | **36+*39/*69* |
| **10x2/*71* | *1* | **71/*36+*10* | **71/*36+*10* | **10/*71* |
| **13C/*39* | *1* | **5/*39* | **39/*13* | **39/*77,*16/*39* |
| **2/*13C* | *1* | **5/*2* | **2/*13* | **2/*16,*2/*77* |
| **34x2/*36+*10* | *1* | **36+*10/*34x2* | **1+*2/*36+*10* | **10+*10/*34+*83* |
| **36+*10/*41x2* | *1* | **39/*69x2* | **36+*10/*69+*83* | **41/*36+*36+*10* |
| **36+*10/*86* | *1* | *PNA* | *none* | **1+rs1065852+*86+rs1456026511/*36* |
| **41/*122* | *3* | **1/*41 or *119/*39* | **1/*41* | **41/*122+rs61737946 or *2/*119 or *1/*41* |
| **41/*62* | *1* | *PNA* | *None* | **62+rs1135840/*69* |
| **41/*81* | *1* | *PNA* | *None* | **39/*41+rs367543000* |
| **4N+*4/*10* | *5* | **4/*36+*10 or *4/*10x2* | **4/*36+*10* | **4/*10+*10 or *4C/*36+*10 or *4/*36+*10* |
| **4N+*4/*10x2* | *1* | *PNA* | **4/*36+*10* | **4C/*36+*10* |
| **4N+*4/*68+*4* | *1* | **4/*10x2* | **10_*36_*4_*68* | **36+*10/*68+*4* |
| **5/*62* | *1* | *PNA* | *None* | **5/*41+rs730882251* |
| **5/*83+*2* | *1* | **39/*69* | *None* | **10/*69* |
| **S2+*1/*10* | *1* | **10/*2* | **10/*2* | **10/*2* |

**Supplementary Figure 1-** Summary of concordance and discordance analysis of SGv2.0.2.
